# Supplementary material
Source: Royal Society of Chemistry journal article supplement (doi:10.1039/d6qi00285d)
Supplement: d6qi00285d1.pdf [file d6qi00285d1.pdf]

## Supporting Information

### ***$\beta$ -Perhalogenated Porphyrins Enable Sensitive Cryogenic NIR***

### ***Lanthanide Thermometry***

**Li-Jun Guo,<sup>‡a</sup> Meng-Xin Wang,<sup>‡a</sup> Zhe-Ming Wang<sup>a</sup> and Jun-Long Zhang<sup>\*a</sup>**

<sup>[a]</sup> *Beijing National Laboratory for Molecular Sciences, College of Chemistry and Molecular Engineering, Peking University, Beijing 100871, P. R. China.*

<sup>[‡]</sup> *These authors contributed equally to this work.*

*\* Correspondence to: Jun-long Zhang, e-mail: [zhangjunlong@pku.edu.cn](mailto:zhangjunlong@pku.edu.cn);*

## Table of Contents

|                                                                         |           |
|-------------------------------------------------------------------------|-----------|
| <b>Supporting Methods</b> .....                                         | <b>3</b>  |
| <b>Chemicals reagents and instruments</b> .....                         | <b>3</b>  |
| <b>Synthesis procedures</b> .....                                       | <b>3</b>  |
| <b>Preparation of PMMA Film</b> .....                                   | <b>5</b>  |
| <b>Near infrared emission spectrum and lifetime</b> .....               | <b>5</b>  |
| <b>Calculation of relative thermal sensitivity Sr</b> .....             | <b>5</b>  |
| <b>Singlet oxygen (<math>^1\text{O}_2</math>) test of Br-1-Nd</b> ..... | <b>6</b>  |
| <b>Supporting figures and tables</b> .....                              | <b>7</b>  |
| $^{19}\text{F}$ NMR .....                                               | <b>7</b>  |
| <b>Mass spectra</b> .....                                               | <b>10</b> |
| <b>IR spectra</b> .....                                                 | <b>12</b> |
| <b>UV spectra</b> .....                                                 | <b>15</b> |
| <b>Summary of crystallographic data</b> .....                           | <b>17</b> |
| <b>Other spectra</b> .....                                              | <b>19</b> |
| <b>Supporting reference</b> .....                                       | <b>27</b> |

# Supporting Methods

## Chemicals reagents and instruments

Column chromatography was carried out on silica gel (200-300 mesh, Qingdao Ocean Chemicals) with the indicated eluents. All other reagents and solvents were used as received. The compound **X-1** (X=H, F, Cl, Br) and the complex **X-1-Er** (X=H, F, Cl, Br) was synthesized according to literature methods.<sup>[1]</sup> <sup>1</sup>H and <sup>19</sup>F NMR spectra were recorded using a Bruker DPX 400 MHz spectrometer and the chemical shifts were reported relative to internal SiMe<sub>4</sub>. ESI mass spectra were recorded using a Bruker APEX IV FTICR mass spectrometer. Electronic absorption spectra were recorded using an Agilent 8453 UV/Vis spectrometer. The luminescence emission and fluorescence spectra were recorded using an Edinburgh FLS1000 spectrometer. The single crystal data were recorded using a Rigaku XtaLAB PRO 007HF(Mo) Single crystal X-ray diffractometer. The differential scanning calorimetry (DSC) spectra were recorded using PE LN2-DSC8500 DSC8500 Differential Scanning Calorimeter (liquid nitrogen).

## Synthesis procedures

Synthesis of **Br-1**, **H-1-Er**, **F-1-Er**, **Cl-1-Er**, **Br-1-Er**, **H-1-Yb** and **H-1-Nd** were synthesized according to the previously reported literature. <sup>[1]</sup>

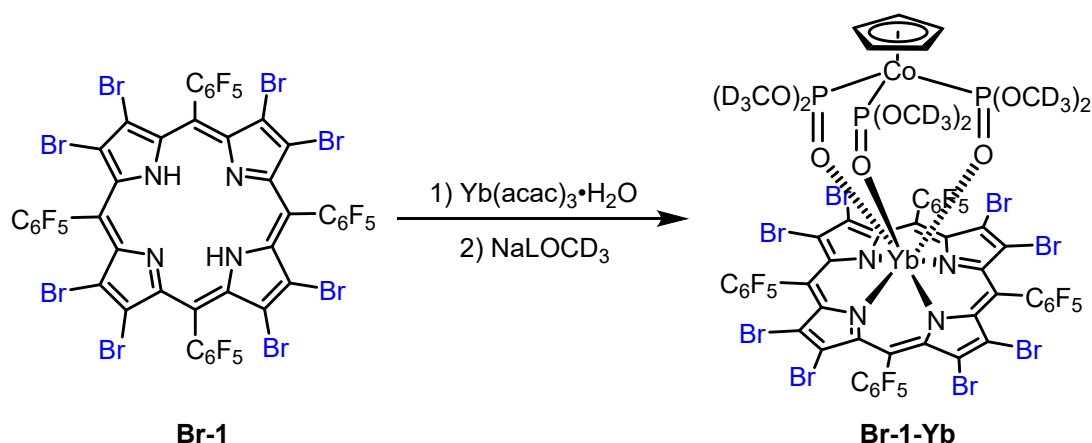

**Synthesis of complex Br-1-Yb** : The ligand **Br-1** (0.03 mmol) and Yb(acac)<sub>3</sub>·nH<sub>2</sub>O (0.15 mmol) were dissolved in 8 mL of anhydrous 1,2,4-trichlorobenzene (TCB) and refluxed for 2 hours under a nitrogen atmosphere. During

this period, the luminescence of the free ligand gradually diminished. Upon cooling to ambient temperature, silica gel chromatography was performed using sequential elution with petroleum ether, dichloromethane, and a dichloromethane/methanol mixture (v/v = 5/1), yielding TCB, unreacted porphyrin ligand, and ytterbium porphyrin complexes. The ytterbium complex was subsequently reacted with 1.2 equivalents of deuterated Klaui ligand in 10 mL of a chloroform/methanol solution (v/v = 4/1) at room temperature for 24 hours. The resulting product was purified by silica gel column chromatography and recrystallized from a dichloromethane/n-hexane mixture, ultimately affording the target compound Br-1-Yb as a green solid. **Br-1-Yb**: Yield: 87%. ESI-HR-MS:  $[M+H^+]$   $m/z$  calcd. for  $C_{35}H_6D_{18}Br_8CoYbF_{20}N_4O_9P_3$ : 2239.371886; Found: 2239.374872.

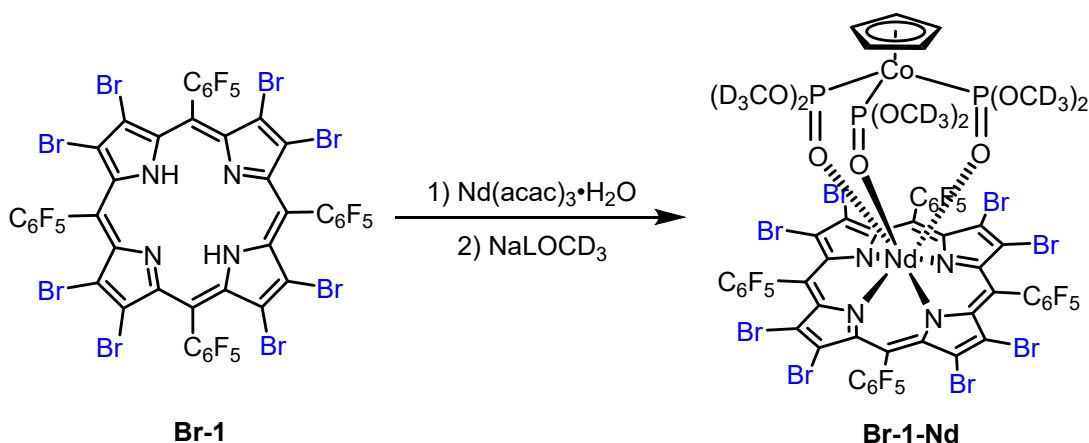

**Synthesis of complex Br-1-Nd** : Ligand **Br-1** (0.03 mmol) and  $Nd(acac)_3 \cdot nH_2O$  (0.15 mmol) were added to 8 mL of anhydrous 1,2,4-trichlorobenzene (TCB) and refluxed under  $N_2$  for 2 h. During the reaction, the luminescence of the free ligand gradually disappeared. After cooling to room temperature, the mixture was successively eluted with petroleum ether,  $CH_2Cl_2$ , and  $CH_2Cl_2/MeOH$  (v/v = 5/1), and the TCB, unreacted porphyrin ligand, and neodymium porphyrin complex were obtained through silica gel chromatography. The neodymium complex was reacted with 1.2 equivalents of deuterated Klaui ligand in a 10 mL  $CHCl_3/MeOH$  (v/v = 4/1) mixed solution at room temperature overnight. Then, the product was separated by silica gel column chromatography and recrystallized from  $CH_2Cl_2$ /hexane to obtain the final product as a green solid. **Br-1-Nd**: Yield: 82%. ESI-HR-MS:  $[M+H^+]$   $m/z$  calcd. for

C<sub>55</sub>H<sub>6</sub>D<sub>18</sub>Br<sub>8</sub>CoNdF<sub>20</sub>N<sub>4</sub>O<sub>9</sub>P<sub>3</sub>: 2207.345445; Found: 2207.343734.

### **Preparation of PMMA Film**

Two poly(methyl methacrylate) (PMMA) beads with a diameter of approximately 3 mm were dissolved in 1 mL of dichloromethane to prepare a 10% PMMA dichloromethane solution. A small amount of the sample was then dissolved in the aforementioned solution to achieve a final concentration of 0.1% for the sample. The solution was subsequently dropped onto the surface of a glass slide with a diameter of 1 cm. After allowing the solvent to evaporate at room temperature for 2 hours, the glass slide was placed in a vacuum drying chamber for an additional 2 hours of drying, resulting in a PMMA film with uniformly dispersed sample.

### **Near infrared emission spectrum and lifetime**

The excitation and emission spectra of all complexes were measured by the Edinburgh FLS1000 steady state/transient fluorescence spectrometer. The source of excitation and emission spectrum is 450 W xenon lamp, and the source of lifetime detection is subtle pulse lamp. The detection system includes near infrared photomultiplier tube (R5509 near infrared PMT (500-1700 nm)) and cooling device (C9940-02 Hamamatsu, -80 °C). During the test, an 850 nm long wave pass filter was added at the transmitting end. An additional variable temperature attachment and control system (Oxford Optistat DN2) is used for variable temperature fluorescence testing. The absorbance of the samples at excitation wavelength is 0.1. Lifetime  $\tau$  is obtained by fitting a single exponential decay function.

### **Calculation of relative thermal sensitivity $S_r$**

The temperature measurement parameter  $\Delta$  (T) used in this section is the ratio between the intensity of a single band and the intensity of two transmitting bands, and the relative thermal sensitivity  $S_r$  is calculated by the Equation 1:

$$S_r(T) = \frac{1}{\Delta(T)} \left| \frac{\partial \Delta}{\partial T} \right| \quad \text{Equation 1}$$

### **Singlet oxygen ( $^1\text{O}_2$ ) test of Br-1-Nd**

Singlet oxygen fluorescence probe (SOSG, 10  $\mu\text{M}$ ) was used at different time points in water /DMF= 1:1 solution under irradiation of 460 nm (10 mW/cm<sup>2</sup>).

### **Dielectric permittivity measurements**

The temperature-dependent ac (alternate current) dielectric permittivity measurements were performed on a TH2828 Precision LCR meter against capacitors made of powder samples. The samples were ground, and pressed into tablets under the pressure of 1.3 GPa. The capacitors were made by painting the two faces of tablet pieces with silver conducting paste and copper wires as the electrodes. These capacitors were kept vacuum-dried over silica gel more than ten days and finally coated by AB glue before dielectric measurements, in order to avoid the influence of moisture. The area and thickness of the capacitors were measured under a microscope with a Phenix CCD eye and the software. The dielectric permittivity measurements were performed on cooling-warming cycle under dried N<sub>2</sub> flow, with the applied voltage of 1.0 V and the temperature sweeping rates of ca. 2 Kmin<sup>-1</sup> using a home-made temperature control system.

# Supporting figures and tables

## $^{19}\text{F}$ NMR

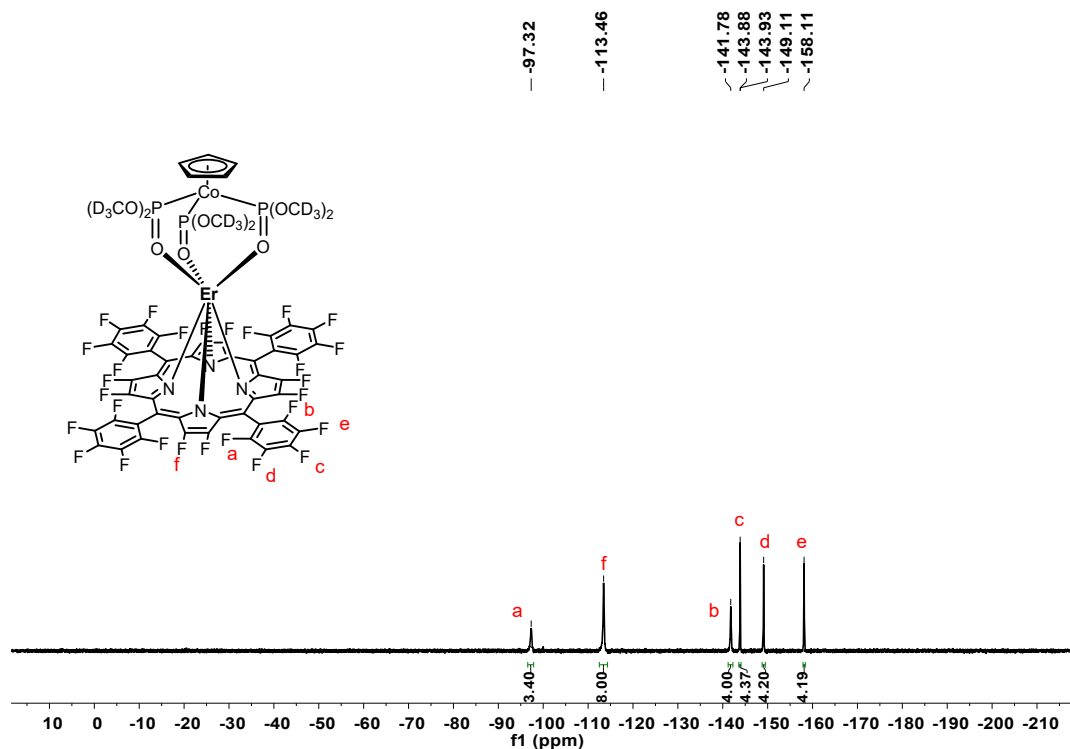

Figure S1  $^{19}\text{F}$  NMR spectrum of F-1-Er (471 MHz,  $\text{CDCl}_3$ ).

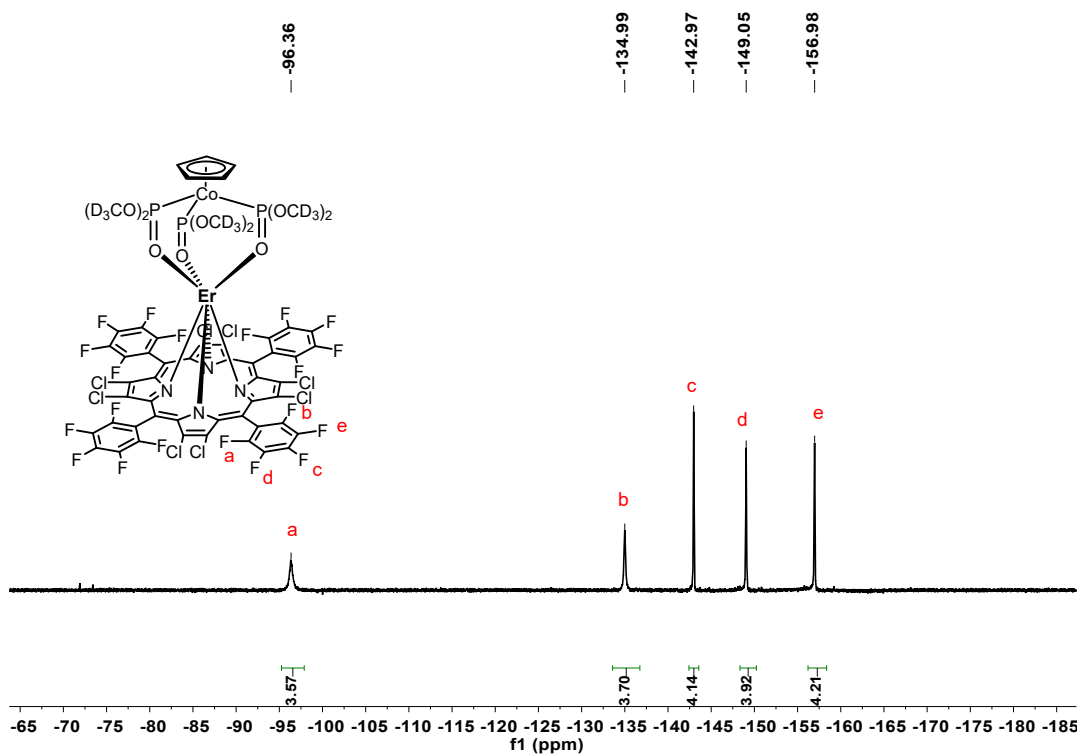

Figure S2  $^{19}\text{F}$  NMR spectrum of Cl-1-Er (471 MHz,  $\text{CDCl}_3$ ).

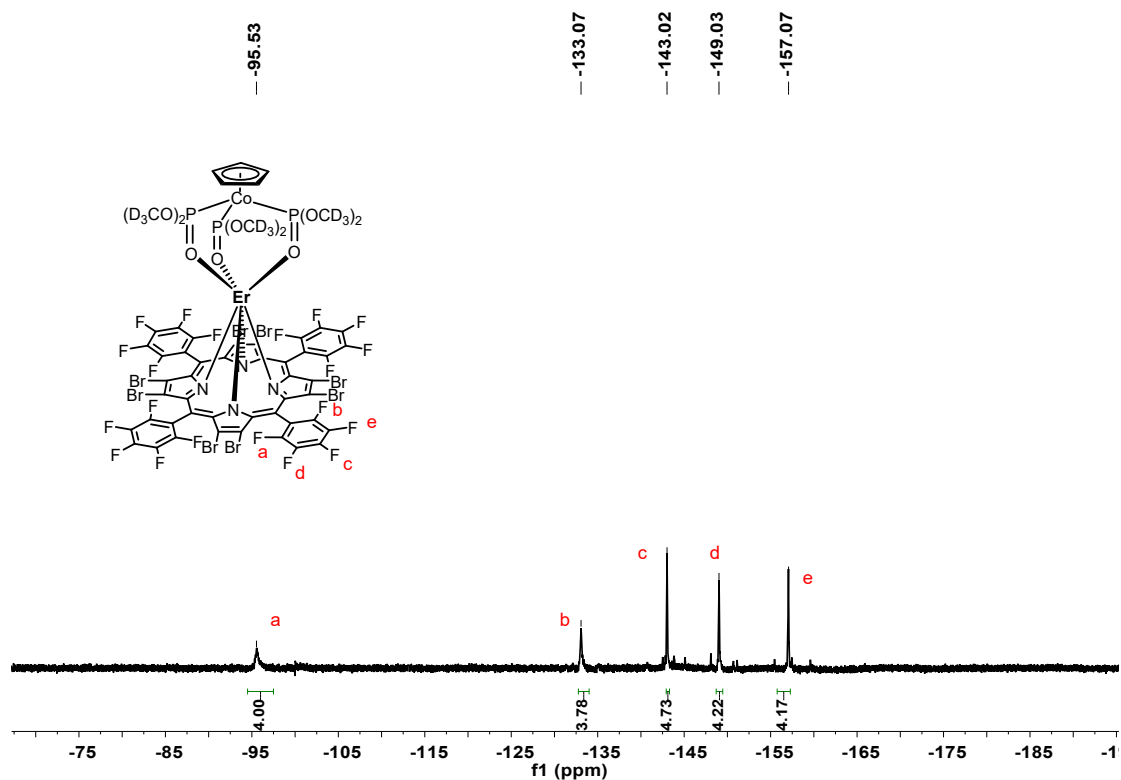

Figure S3  $^{19}\text{F}$  NMR spectrum of **Br-1-Er** (471 MHz,  $\text{CDCl}_3$ ).

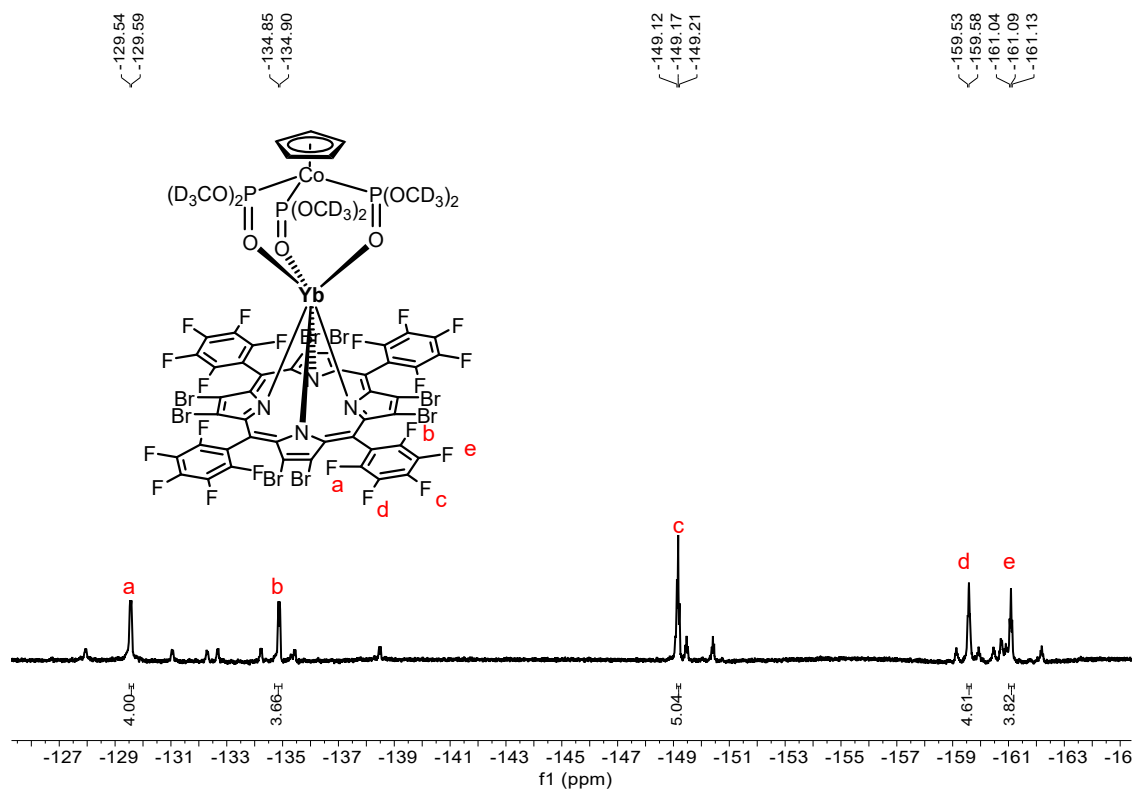

Figure S4  $^{19}\text{F}$  NMR spectrum of **Br-1-Yb** (471 MHz,  $\text{CDCl}_3$ ).

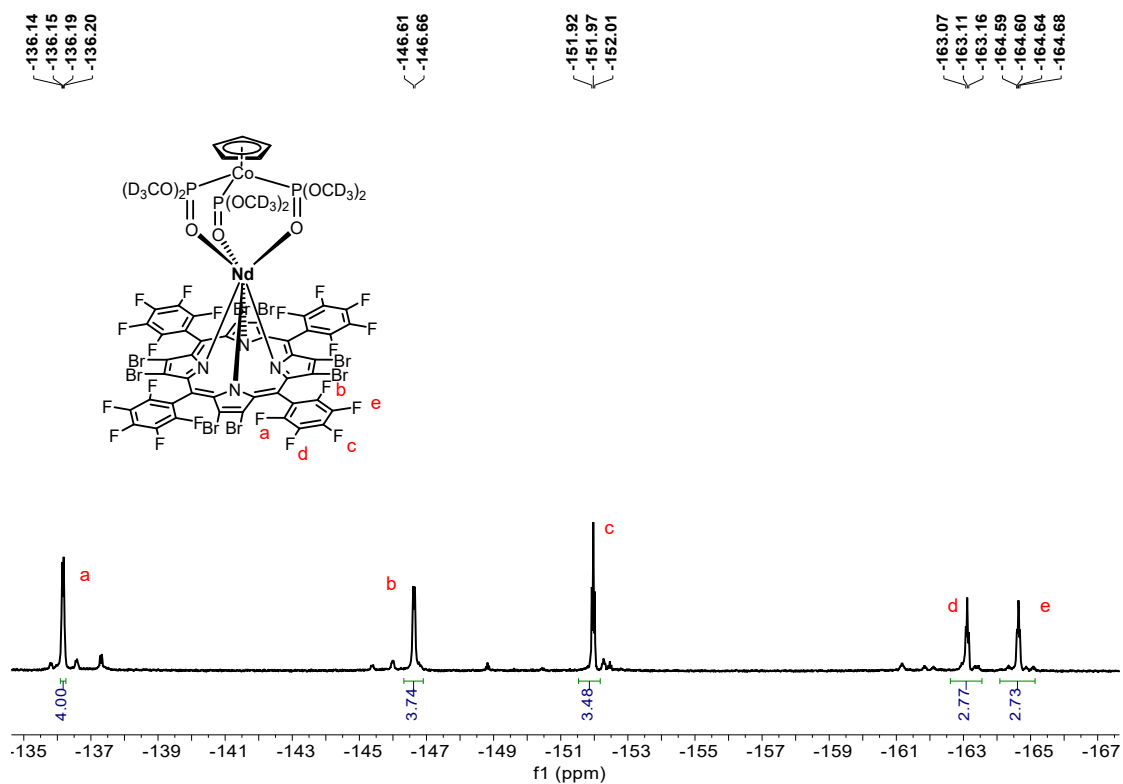

**Figure S5**  $^{19}\text{F}$  NMR spectrum of **Br-1-Nd** (471 MHz,  $\text{CDCl}_3$ ).

## Mass spectra

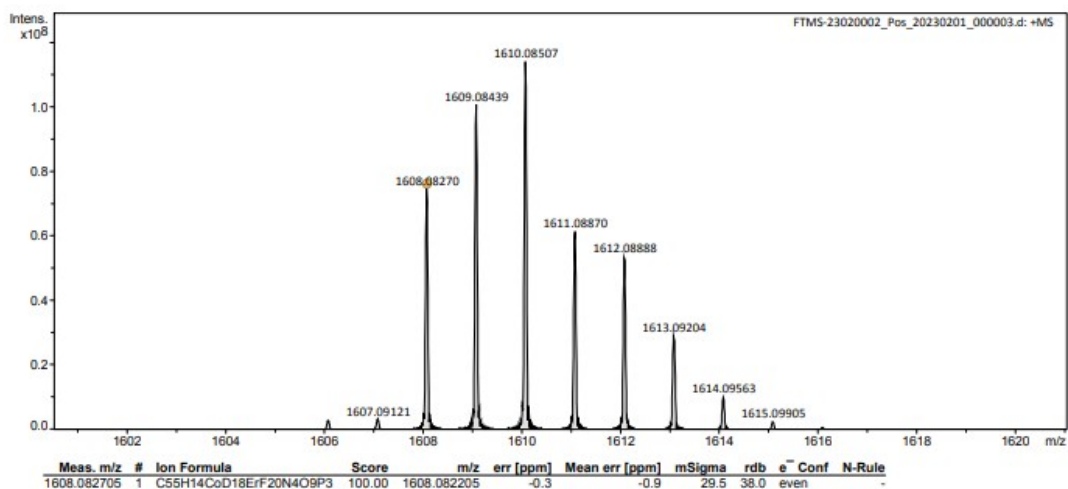

Figure S6 ESI-HRMS of H-1-Er.

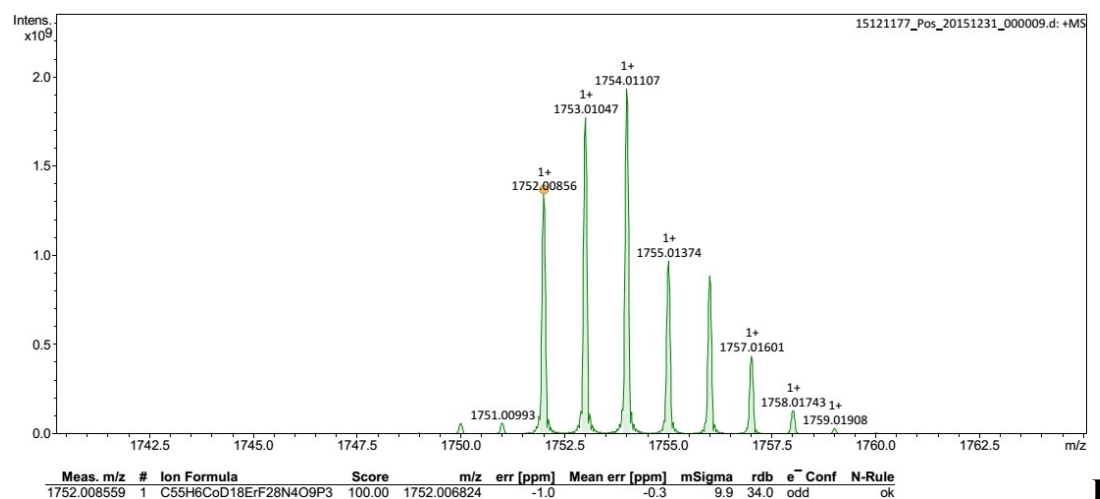

Figure S7 ESI-HRMS of F-1-Er.

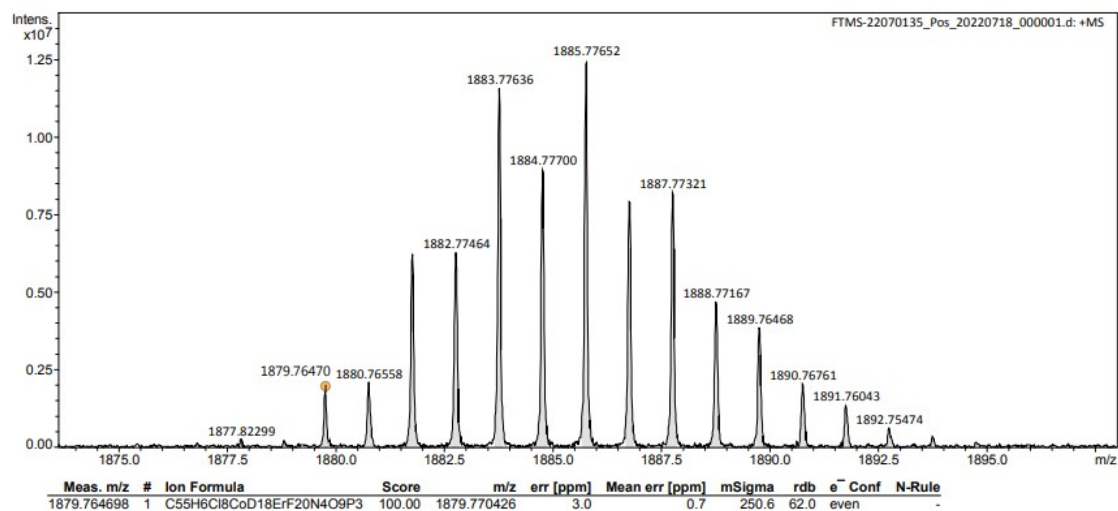

**Figure S8 ESI-HRMS of Cl-1-Er.**

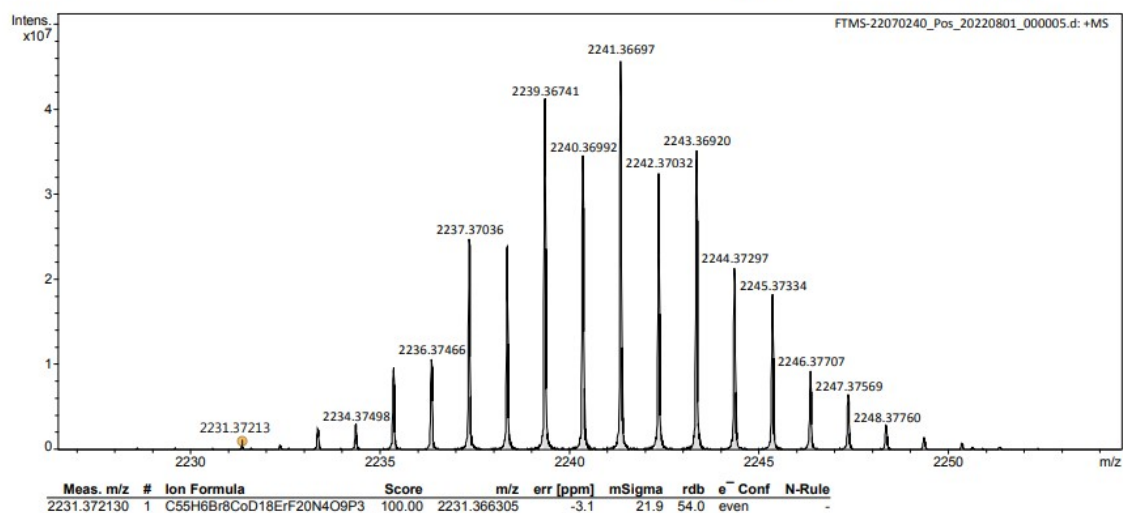

**Figure S9 ESI-HRMS of Br-1-Er.**

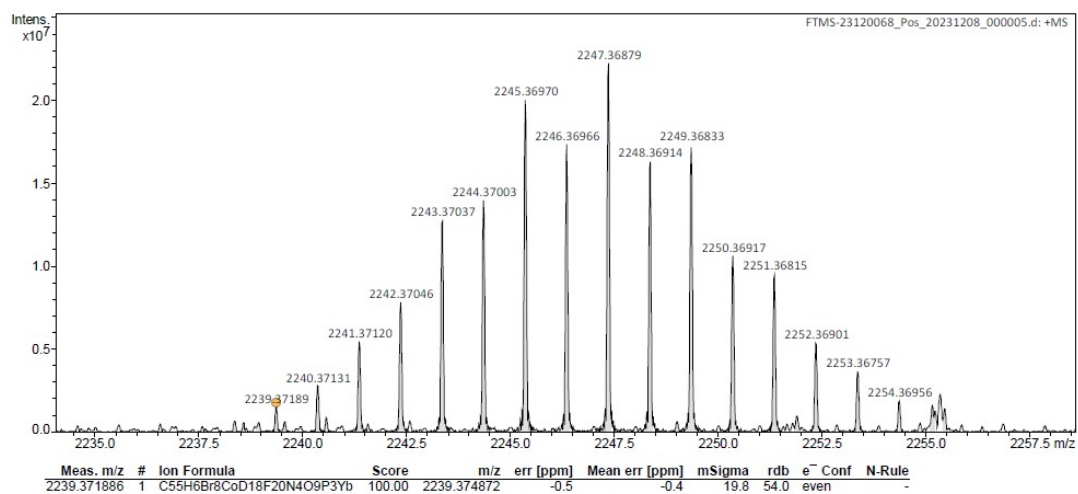

**Figure S10 ESI-HRMS of Br-1-Yb.**

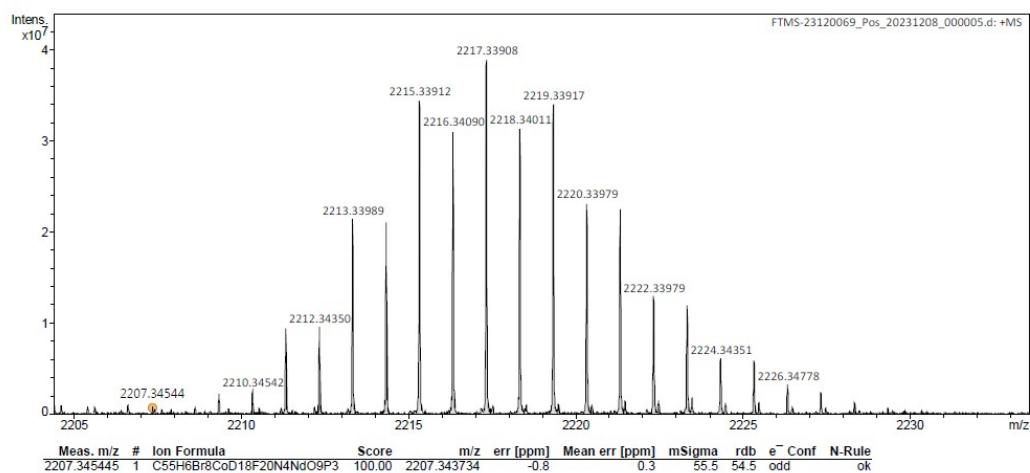

**Figure S11** ESI-HRMS of **Br-1-Nd**.

## IR spectra

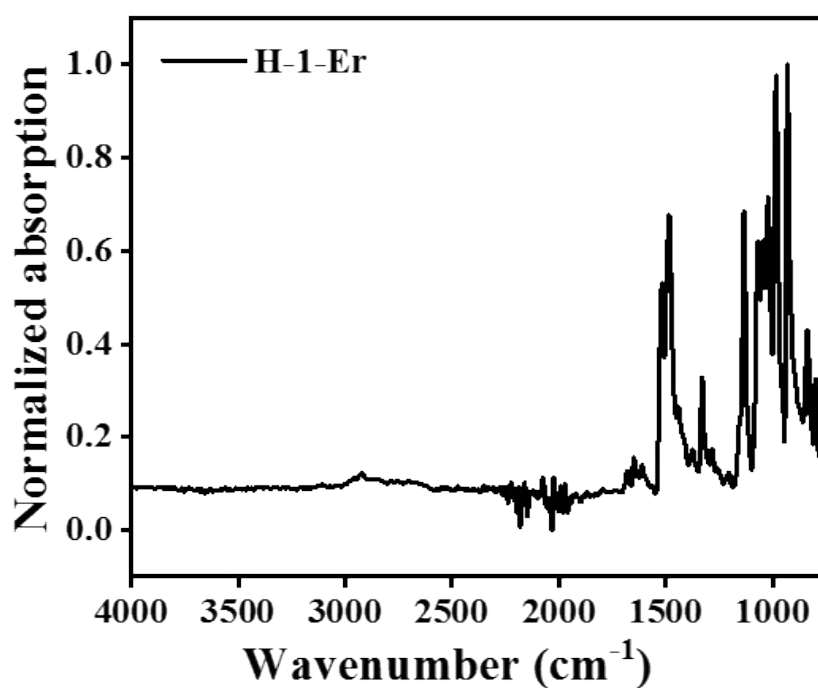

**Figure S12** Normalized IR spectrum of H-1-Er (KBr pellet) recorded at room temperature.

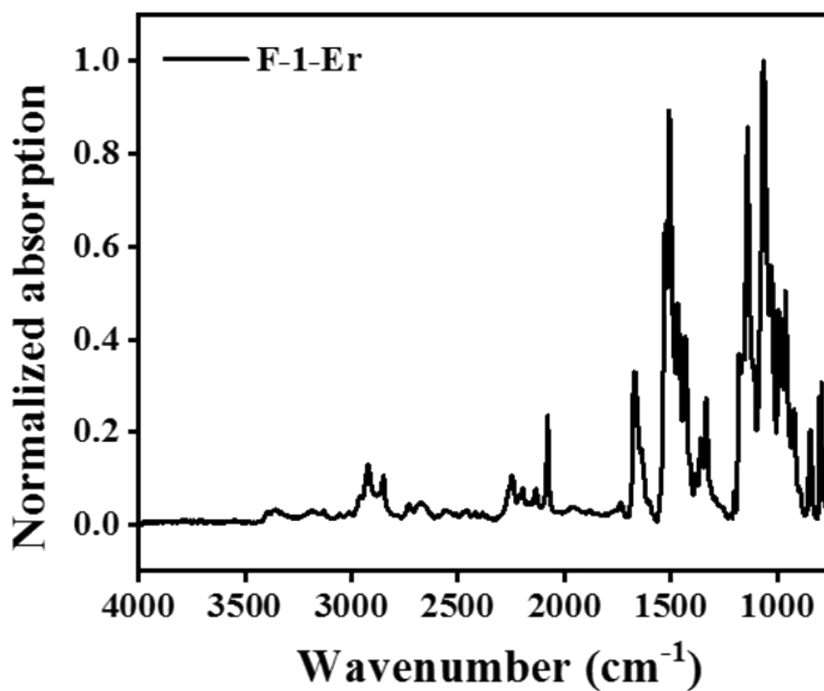

**Figure S13** Normalized IR spectrum of F-1-Er (KBr pellet) recorded at room temperature.

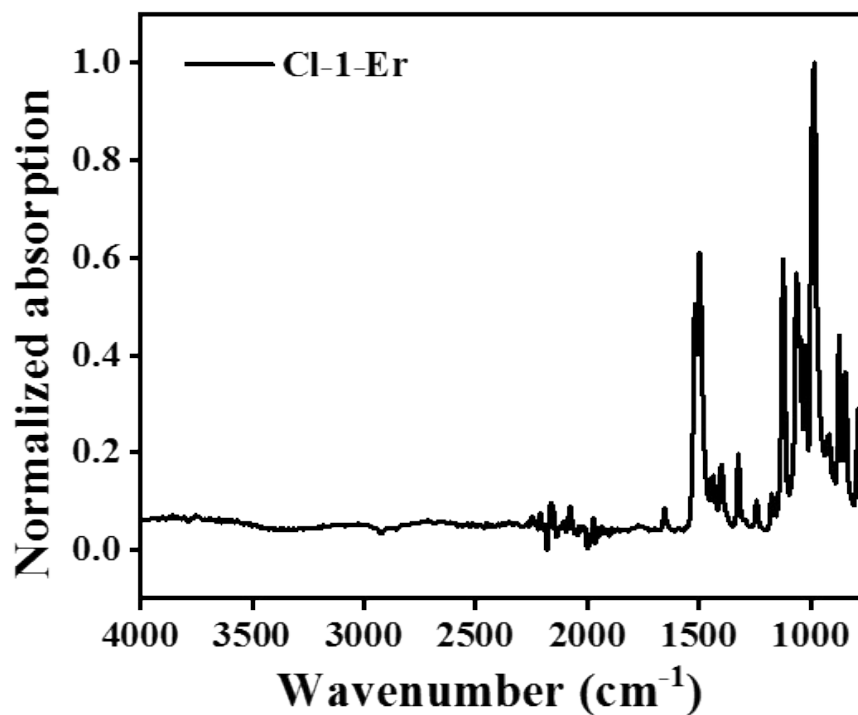

**Figure S14** Normalized IR spectrum of **Cl-1-Er** (KBr pellet) recorded at room temperature.

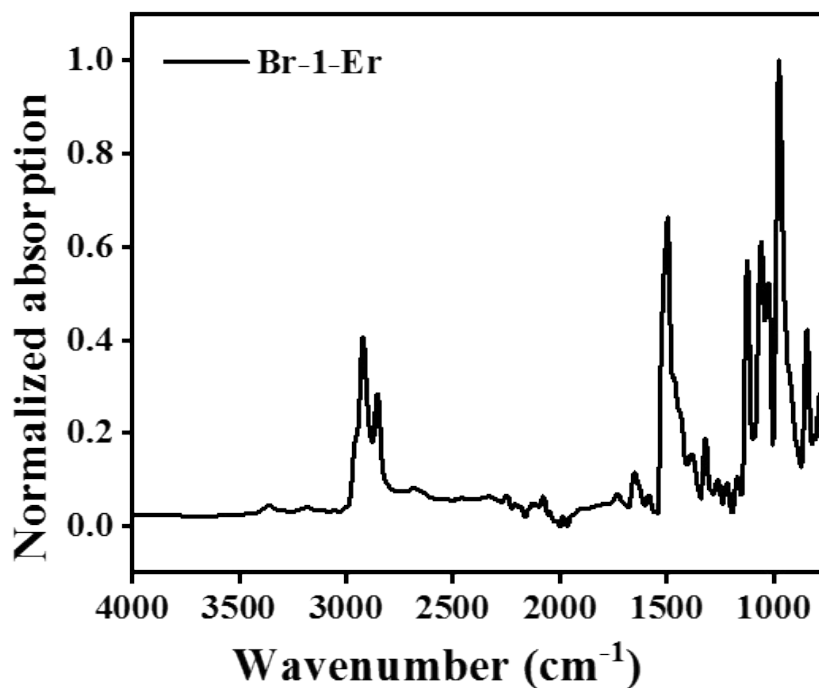

**Figure S15** Normalized IR spectrum of **Br-1-Er** (KBr pellet) recorded at room temperature.

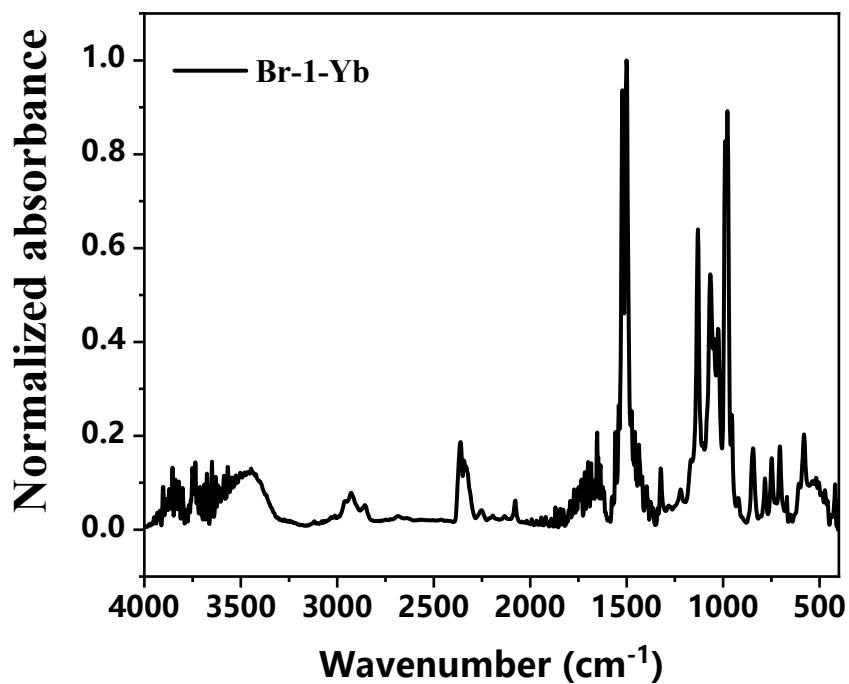

Figure S16 Normalized IR spectrum of **Br-1-Yb** (KBr pellet) recorded at room temperature.

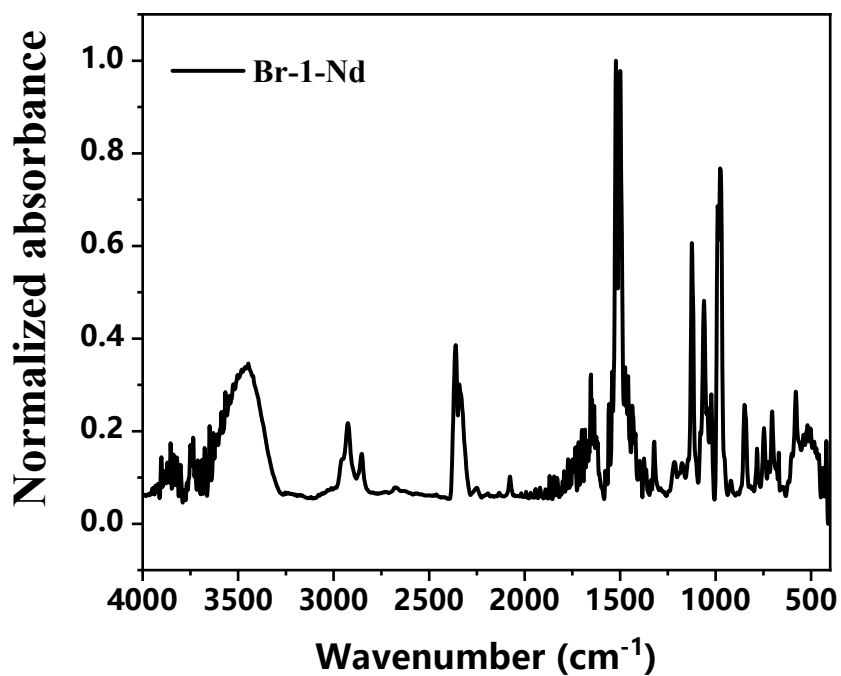

Figure S17 Normalized IR spectrum of **Br-1-Nd** (KBr pellet) recorded at room temperature.

## UV spectra

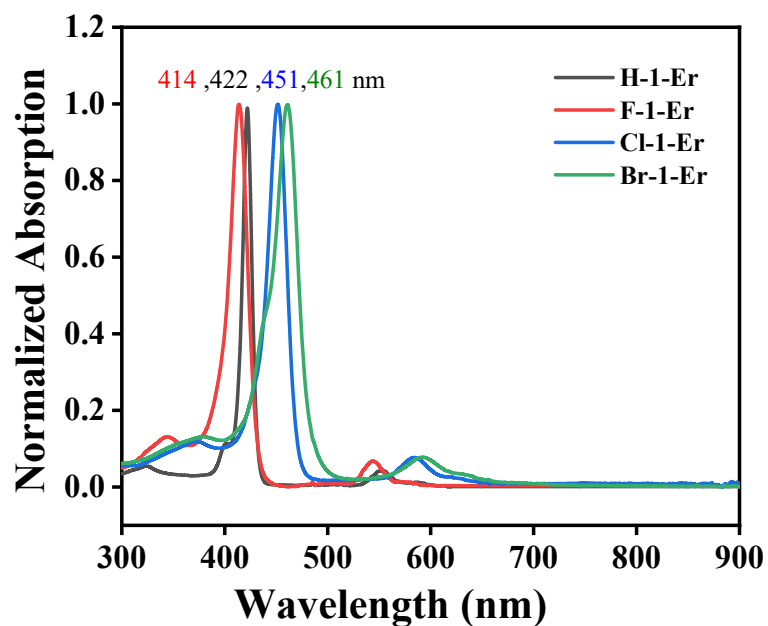

**Figure S18** Normalized UV-visible absorption spectra of X-1-Er (X = H, F, Cl, Br) in dichloromethane solution at room temperature.

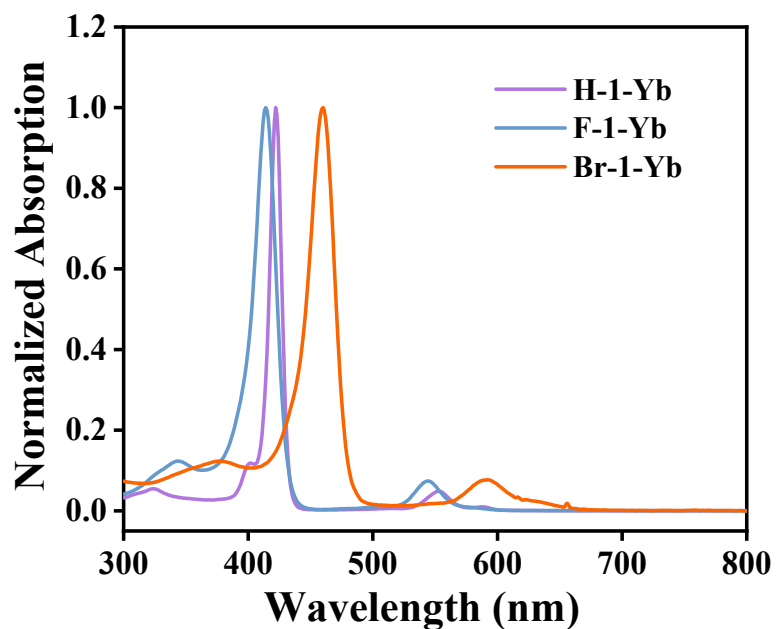

**Figure S19** Normalized UV-visible absorption spectra of X-1-Yb (X = H, F, Br) in dichloromethane solution at room temperature.

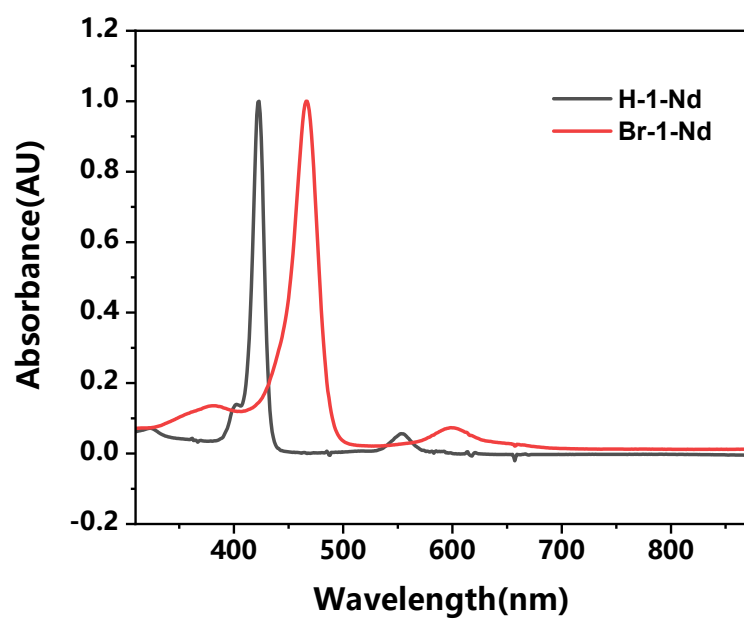

**Figure S20** Normalized UV-visible absorption spectra of **X-1-Nd** (X = H, Br) in dichloromethane solution at room temperature.

## Summary of crystallographic data

**Table S1 Crystal data and structure refinement for Br-1-Er-90K (CCDC: 2451473).**

| Identification code                         | <b>Br-1-Er-90K</b>                                                                                                              |
|---------------------------------------------|---------------------------------------------------------------------------------------------------------------------------------|
| Molecular formula                           | C <sub>55</sub> H <sub>5</sub> D <sub>18</sub> Br <sub>8</sub> CoErF <sub>20</sub> N <sub>4</sub> O <sub>9</sub> P <sub>3</sub> |
| Formula wt. (g mol <sup>-1</sup> )          | 2240.23                                                                                                                         |
| Temperature (K)                             | 90                                                                                                                              |
| Radiation ( $\lambda$ , Å)                  | 0.71073                                                                                                                         |
| Crystal system                              | tetragonal                                                                                                                      |
| Space group                                 | <i>P</i> -4                                                                                                                     |
| <i>a</i> (Å)                                | 20.7534(2)                                                                                                                      |
| <i>b</i> (Å)                                | 20.7534(2)                                                                                                                      |
| <i>c</i> (Å)                                | 10.24650(10)                                                                                                                    |
| $\alpha$ (°)                                | 90                                                                                                                              |
| $\beta$ (°)                                 | 90                                                                                                                              |
| $\gamma$ (°)                                | 90                                                                                                                              |
| Volume (Å <sup>3</sup> )                    | 4413.20(10)                                                                                                                     |
| <i>Z</i>                                    | 2                                                                                                                               |
| $\rho_{\text{calcd}}$ (g cm <sup>-3</sup> ) | 1.672                                                                                                                           |
| $\mu$ (mm <sup>-1</sup> )                   | 4.894                                                                                                                           |
| F (000)                                     | 2106.0                                                                                                                          |
| Crystal size (mm <sup>3</sup> )             | 0.6×0.15×0.05                                                                                                                   |
| Theta range                                 | 2.194 to 29.511°                                                                                                                |
| Reflections collected                       | 61402                                                                                                                           |
| Independent reflections                     | 11447 [R(int) = 0.0482]                                                                                                         |
| Completeness                                | 95%                                                                                                                             |
| Goodness-of-fit on F <sup>2</sup>           | 1.059                                                                                                                           |
| Final R indices                             | R1 <sup>a</sup> = 0.0368                                                                                                        |
| [R > 2 $\sigma$ (I)]                        | wR2 <sup>b</sup> = 0.0939                                                                                                       |
| R indices (all data)                        | R1 <sup>a</sup> = 0.0418                                                                                                        |
|                                             | wR2 <sup>b</sup> = 0.0956                                                                                                       |

Largest diff. peak and hole ( $e \text{ \AA}^{-3}$ )

1.57 and -1.00

---

**Table S2 Crystal data and structure refinement for H-1-Er-90K (CCDC: 2451475).**

| Identification code                         | H-1-Er-90K                                                                                       |
|---------------------------------------------|--------------------------------------------------------------------------------------------------|
| Empirical formula                           | C <sub>55</sub> H <sub>31</sub> CoErF <sub>20</sub> N <sub>4</sub> O <sub>9</sub> P <sub>3</sub> |
| Formula weight                              | 1590.94                                                                                          |
| Temperature/K                               | 90.8(3)                                                                                          |
| Crystal system                              | orthorhombic                                                                                     |
| Space group                                 | <i>Pnma</i>                                                                                      |
| a/Å                                         | 19.6546(2)                                                                                       |
| b/Å                                         | 22.8703(3)                                                                                       |
| c/Å                                         | 15.5652(2)                                                                                       |
| α/°                                         | 90                                                                                               |
| β/°                                         | 90                                                                                               |
| γ/°                                         | 90                                                                                               |
| Volume/Å <sup>3</sup>                       | 6996.66(15)                                                                                      |
| Z                                           | 4                                                                                                |
| ρ <sub>calc</sub> /g/cm <sup>3</sup>        | 1.510                                                                                            |
| μ/mm <sup>-1</sup>                          | 1.600                                                                                            |
| F(000)                                      | 3124.0                                                                                           |
| Crystal size/mm <sup>3</sup>                | 0.4 × 0.2 × 0.2                                                                                  |
| Radiation                                   | Mo Kα (λ = 0.71073)                                                                              |
| 2θ range for data collection/°              | 3.166 to 61.62                                                                                   |
| Index ranges                                | -27 ≤ h ≤ 26, -32 ≤ k ≤ 28, -20 ≤ l ≤ 21                                                         |
| Reflections collected                       | 84715                                                                                            |
| Independent reflections                     | 10202 [R <sub>int</sub> = 0.0329, R <sub>sigma</sub> = 0.0224]                                   |
| Data/restraints/parameters                  | 10202/24/490                                                                                     |
| Goodness-of-fit on F <sup>2</sup>           | 1.058                                                                                            |
| Final R indexes [I ≥ 2σ (I)]                | R <sub>1</sub> = 0.0276, wR <sub>2</sub> = 0.0709                                                |
| Final R indexes [all data]                  | R <sub>1</sub> = 0.0400, wR <sub>2</sub> = 0.0772                                                |
| Largest diff. peak/hole / e Å <sup>-3</sup> | 1.13/-0.87                                                                                       |

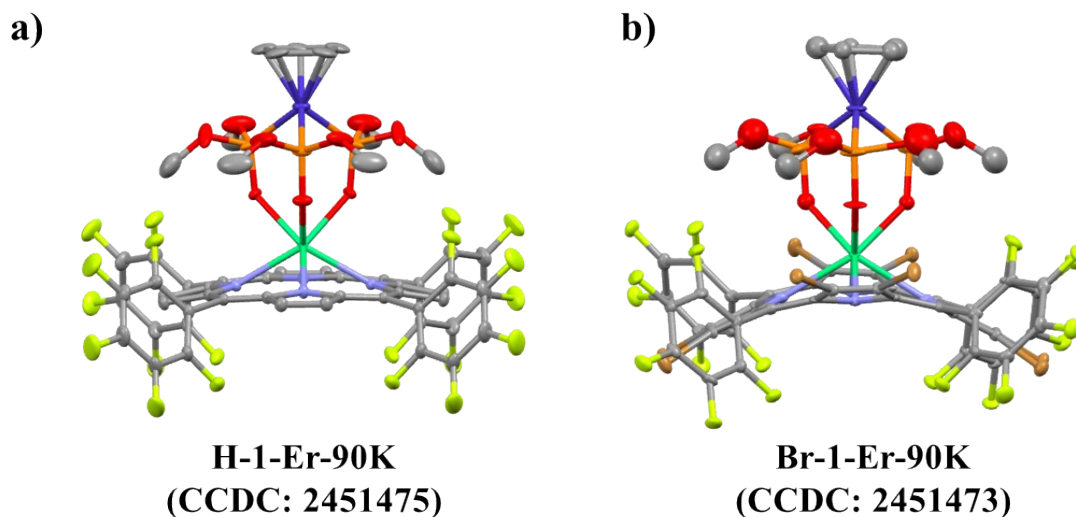

**Figure S21** Single crystal structure of (a) **H-1-Er-90K** and (b) **Br-1-Er-90K** measured at 90 K. The crystal was grown by slow evaporation from a mixed solution of dichloromethane and n-hexane.

### Other spectra

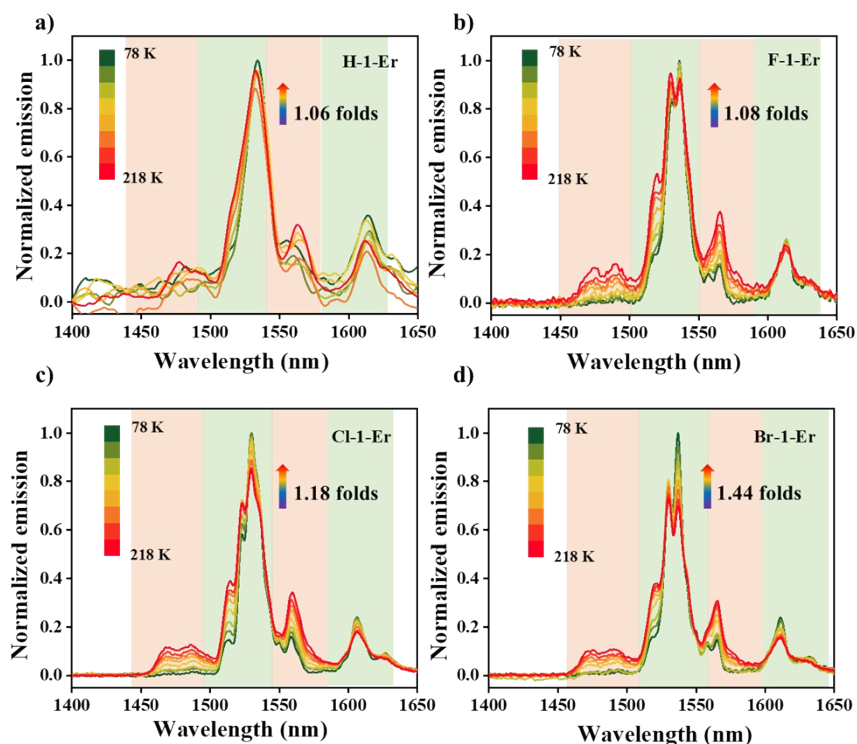

**Figure S22** Emission spectra of complex a) **H-1-Er** ( $\lambda_{\text{ex}}=414$  nm), b) **F-1-Er** ( $\lambda_{\text{ex}}=422$  nm), c) **Cl-1-Er** ( $\lambda_{\text{ex}}=451$  nm), d) **Br-1-Er** ( $\lambda_{\text{ex}}=461$  nm) in PMMA from 78-218 K.

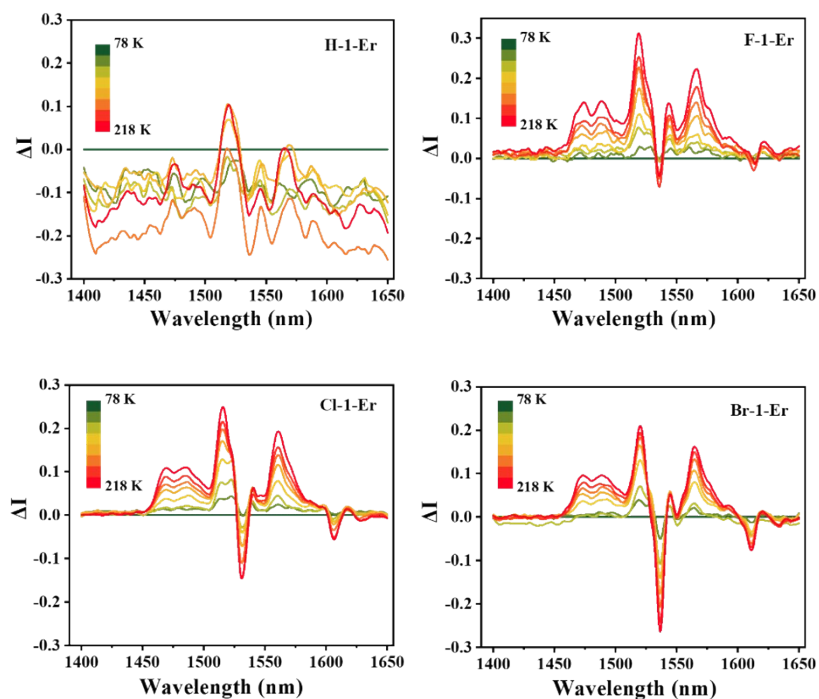

**Figure S23** Differential emission spectra of complex a) **H-1-Er** ( $\lambda_{\text{ex}}=414$  nm), b) **F-1-Er** ( $\lambda_{\text{ex}}=422$  nm), c) **Cl-1-Er** ( $\lambda_{\text{ex}}=451$  nm), d) **Br-1-Er** ( $\lambda_{\text{ex}}=461$  nm) in PMMA from 78-218 K.

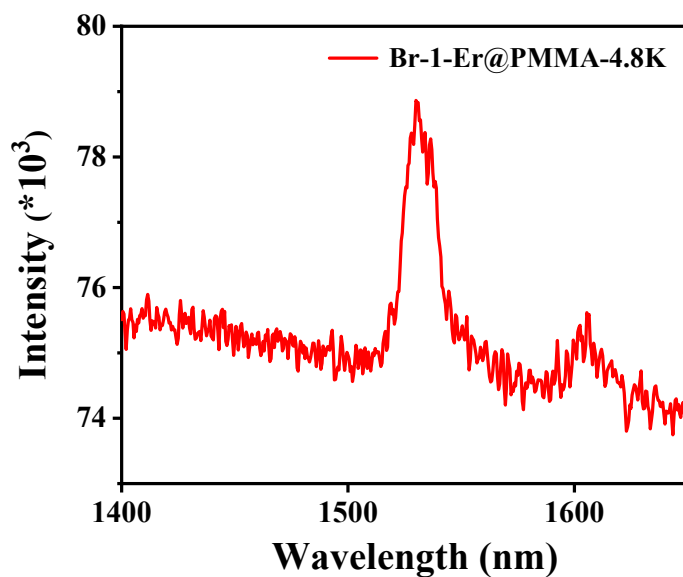

**Figure S24** Emission spectrum of **Br-1-Er** in PMMA at 4.8 K ( $\lambda_{\text{ex}}=460$  nm).

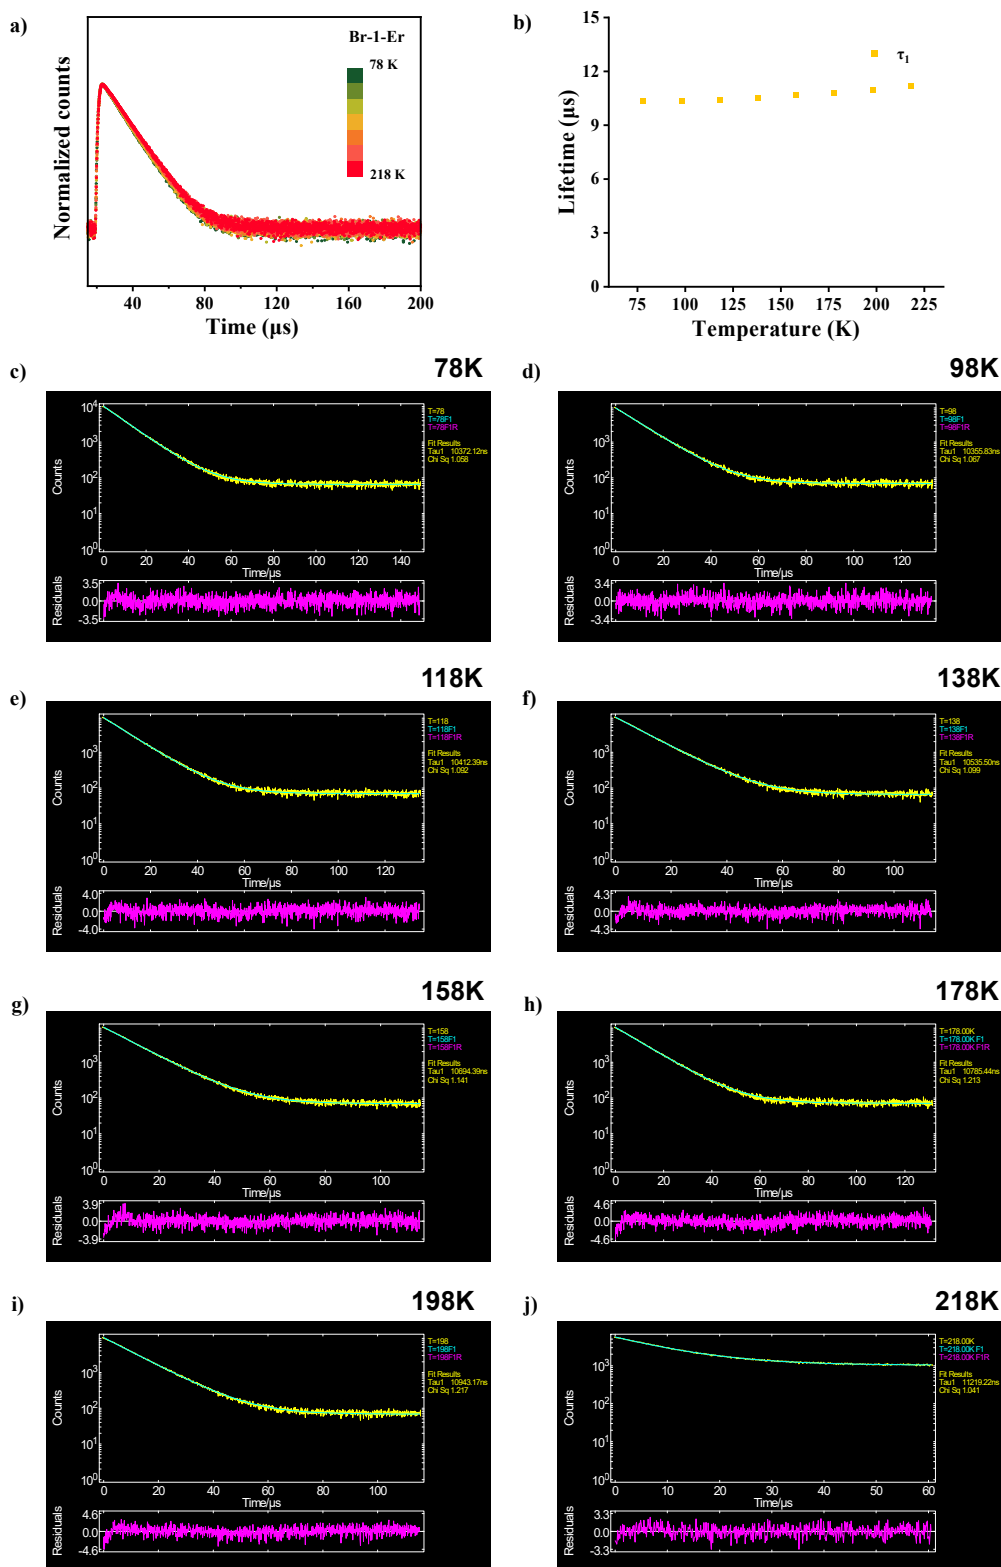

**Figure S25** a) PL decay curves of the complex **Br-1-Er** in PMMA at different temperatures ( $\lambda_{\text{ex}}=461$  nm) (y-axis is shown on a logarithmic scale); b) Plot of lifetime variations of the complex **Br-1-Er** in PMMA from 78-218 K. c-j) Fitting results of **Br-1-Er** at various temperatures in PMMA ( $\lambda_{\text{ex}} = 461$  nm,  $\lambda_{\text{em}} = 1537$  nm).

## Direct excitation of Er<sup>3+</sup>

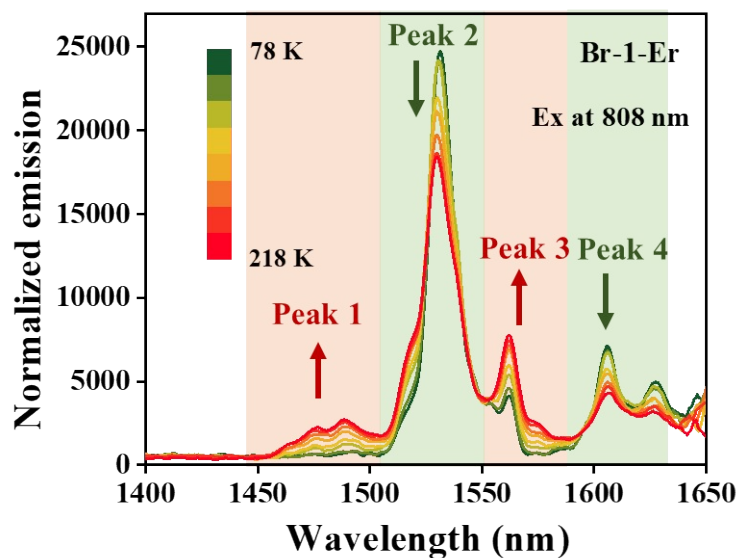

Figure S26 Luminescence spectra of the complex Br-1-Er in PMMA under excitation at 808 nm from 78-218 K ( $\lambda_{\text{ex}}=808$  nm).

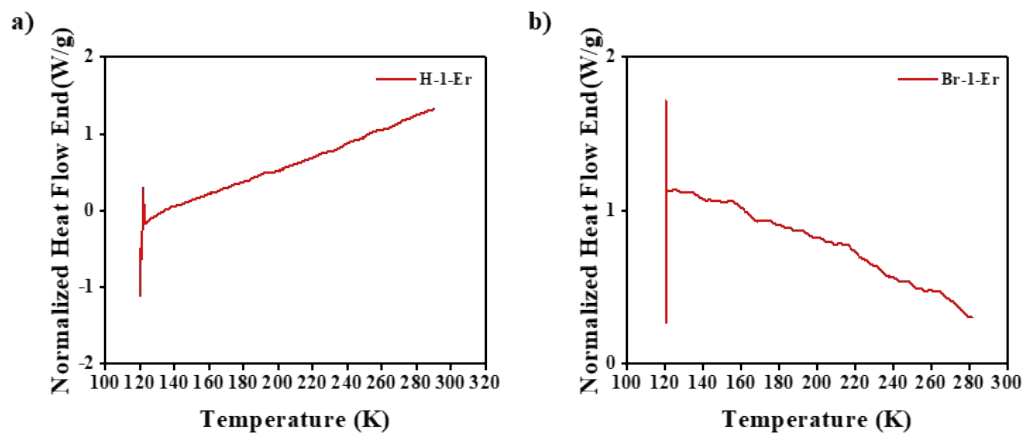

Figure S27 DSC curves of the complexes a) H-1-Er and b) Br-1-Er.

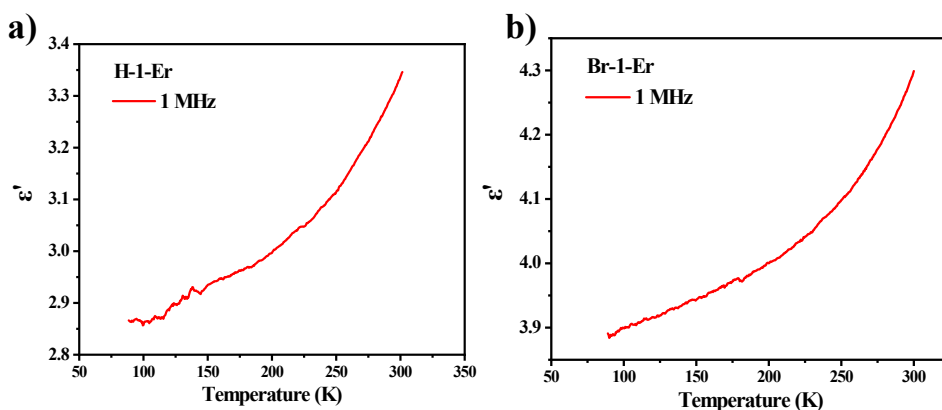

**Figure S28** Temperature-dependent ac (alternate current) dielectric permittivity measurements of a) **H-1-Er** and b) **Br-1-Er** from 78-298 K.

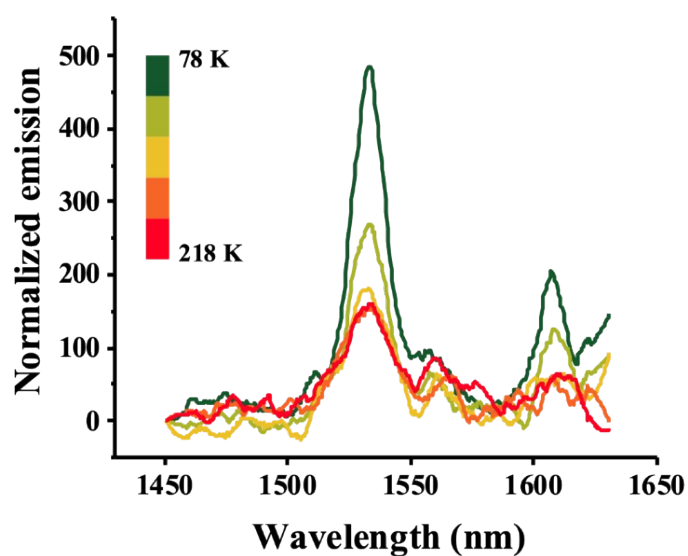

**Figure S29** Variable temperature spectra of **Br-1-Er** in 2-methyltetrahydrofuran solution from 78-218 K ( $\lambda_{\text{ex}}=461$  nm.), the absorbance of excitation wavelength was fixed at 0.1.

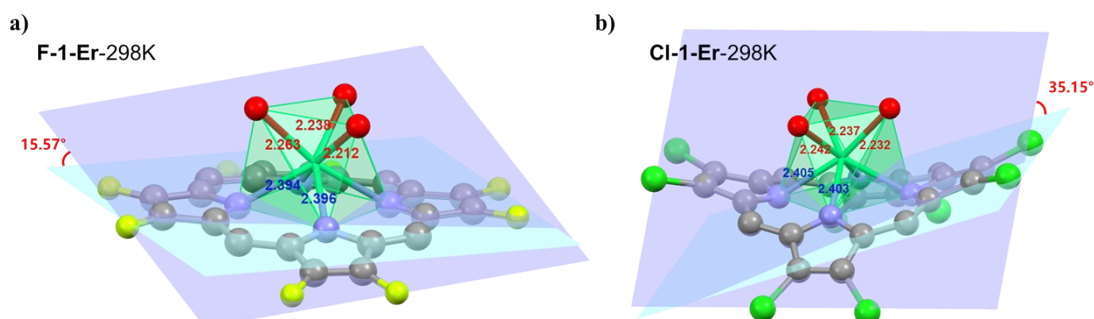

**Figure S30** Single X-ray crystal structures of **F-1-Er** (a) and **Cl-1-Er** (b). To observe the distortion of the porphyrin ring, partial atoms are omitted for clarity.

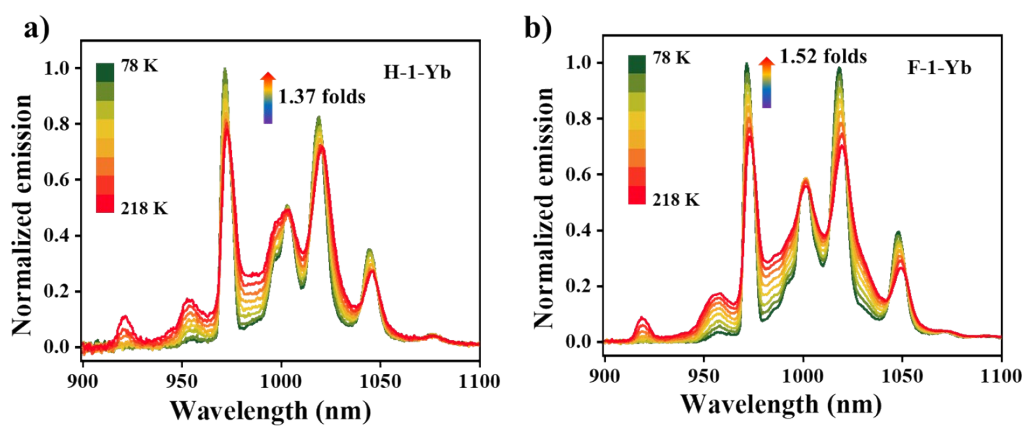

**Figure S31** a) Normalized emission spectra of **H-1-Yb** in PMMA from 78-218 K upon excitation at 422 nm; b) Normalized emission spectra of **F-1-Yb** in PMMA from 78-218 K upon excitation at 414 nm.

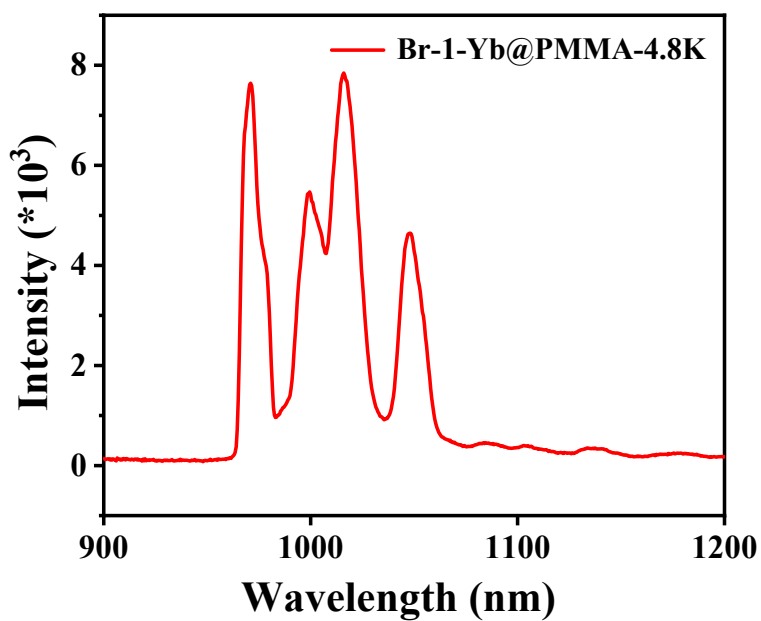

**Figure S32** Emission spectrum of **Br-1-Yb** in PMMA at 4.8 K upon excitation at 460 nm.

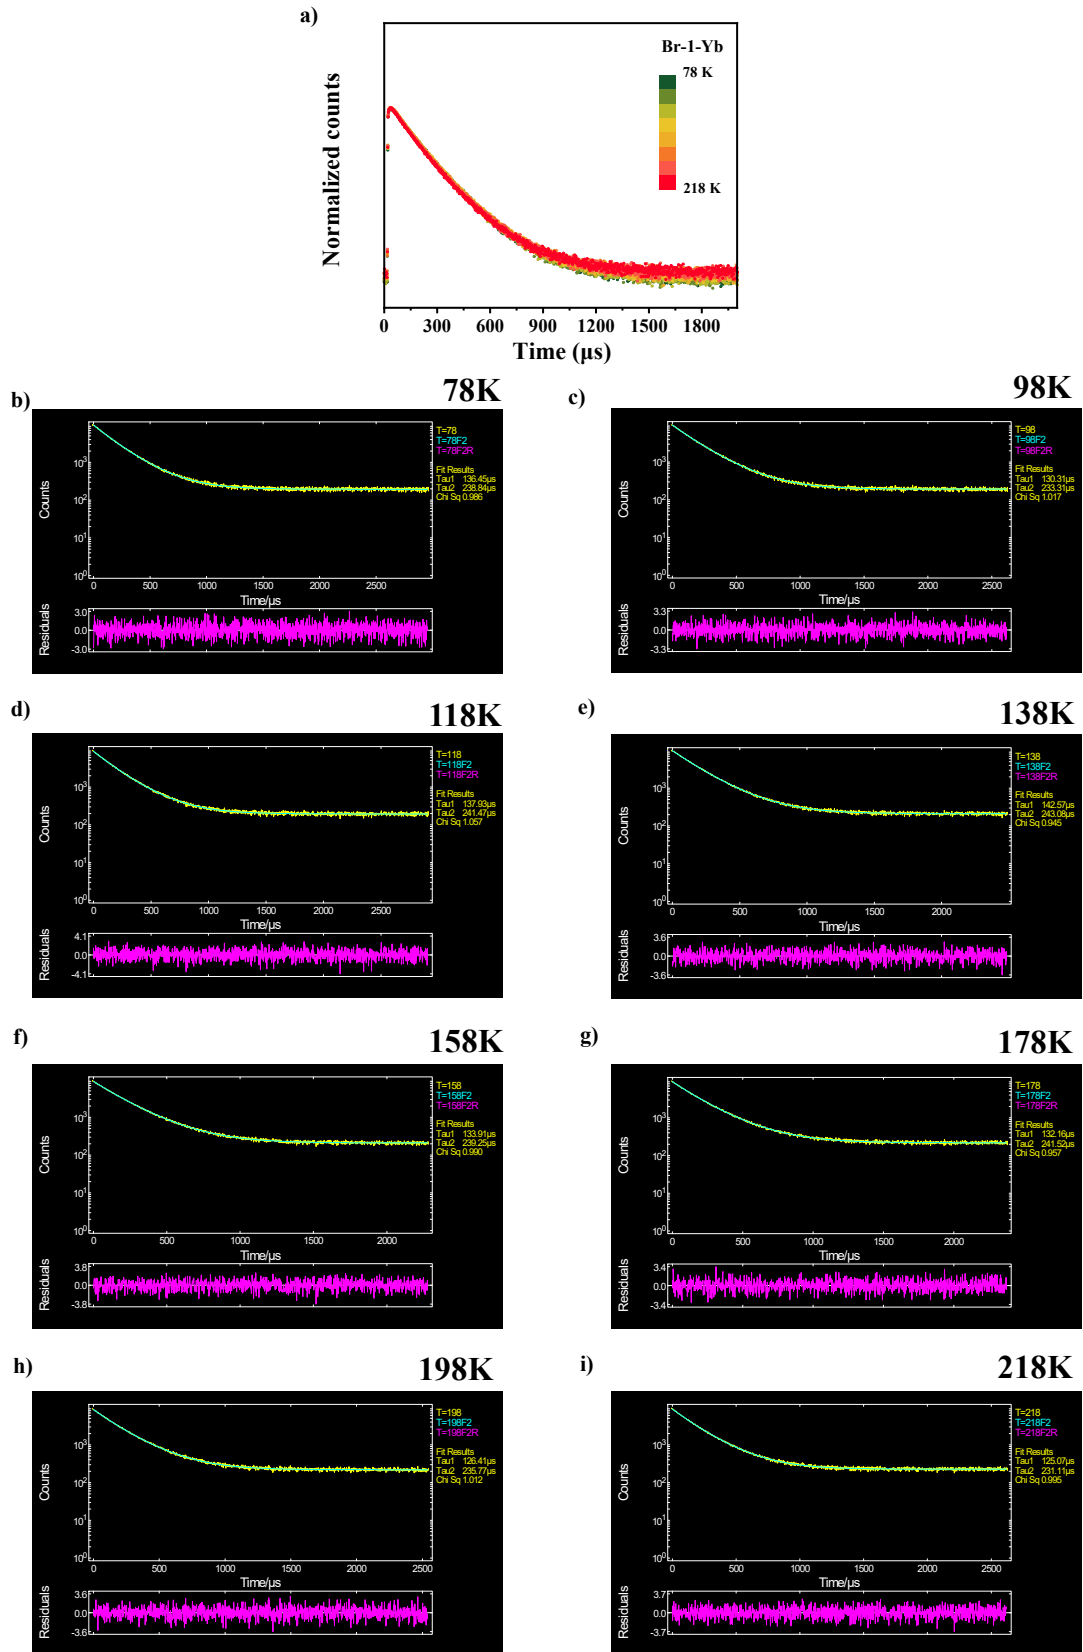

**Figure S33** (a) PL decay curves of the complex **Br-1-Yb** in PMMA from 78-218 K upon excitation at 460 nm (y-axis is shown on a logarithmic scale); b-i) Fitting results of **Br-1-Yb** at various temperatures in PMMA ( $\lambda_{\text{ex}}=460$  nm,  $\lambda_{\text{em}}=977$  nm).

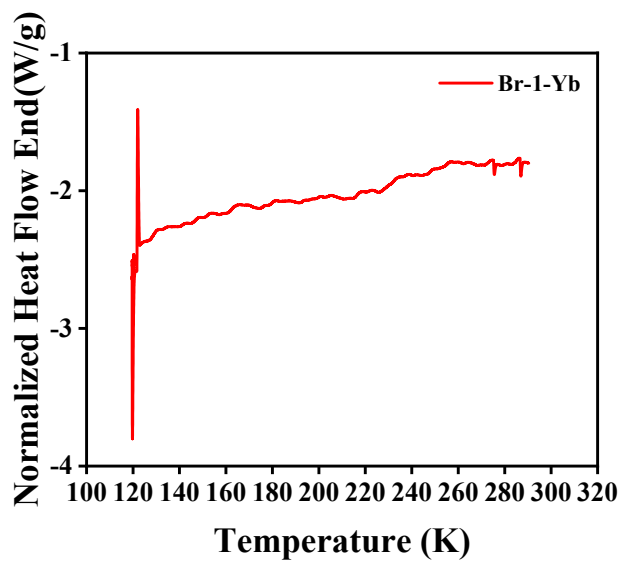

Figure S34 DSC curves of the complex **Br-1-Yb**.

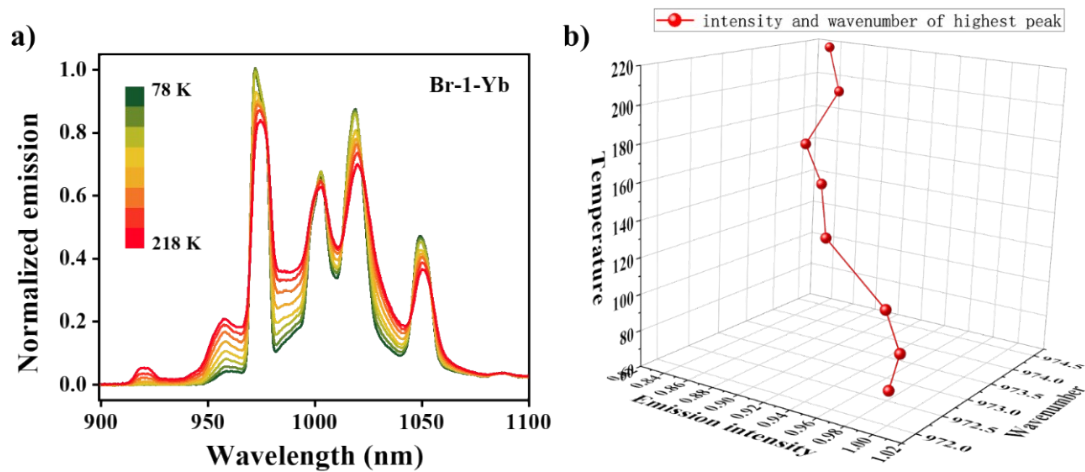

Figure S35 a) Luminescence emission diagram of the complex **Br-1-Yb** in 2-methyltetrahydrofuran from 78-218 K upon excitation at 460 nm; b) Luminescence emission peaking intensity and wavelength changes of the complex **Br-1-Yb** in 2-methyltetrahydrofuran at about 970 nm from 78-218 K.

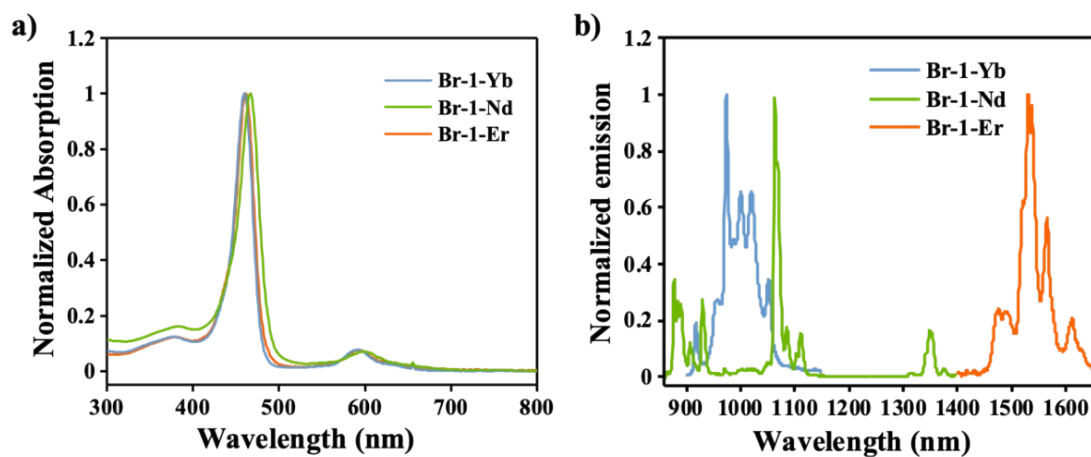

**Figure S36** a) UV-visible absorption spectra and b) luminescence emission spectra of complexes **Br-1-Er**, **Br-1-Yb** and **Br-1-Nd** in dichloromethane solution upon excitation at 460 nm from 78-218 K.

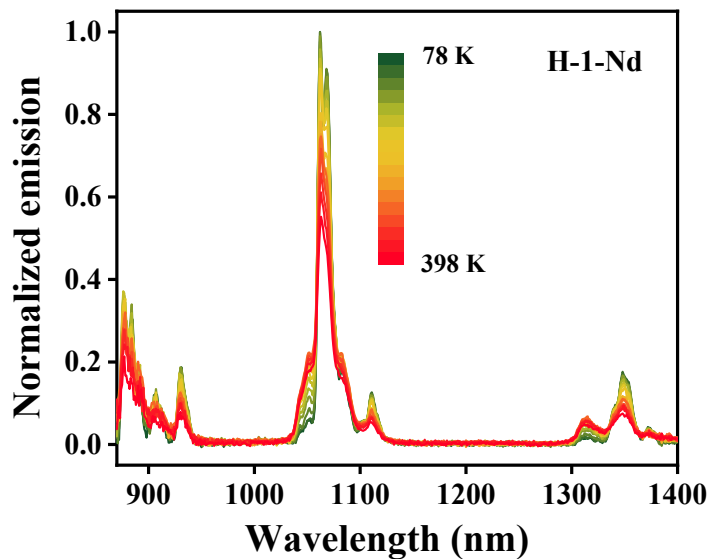

**Figure S37** Luminescence spectra of the complex **H-1-Nd** in PMMA under excitation at 420 nm from 78-398 K.

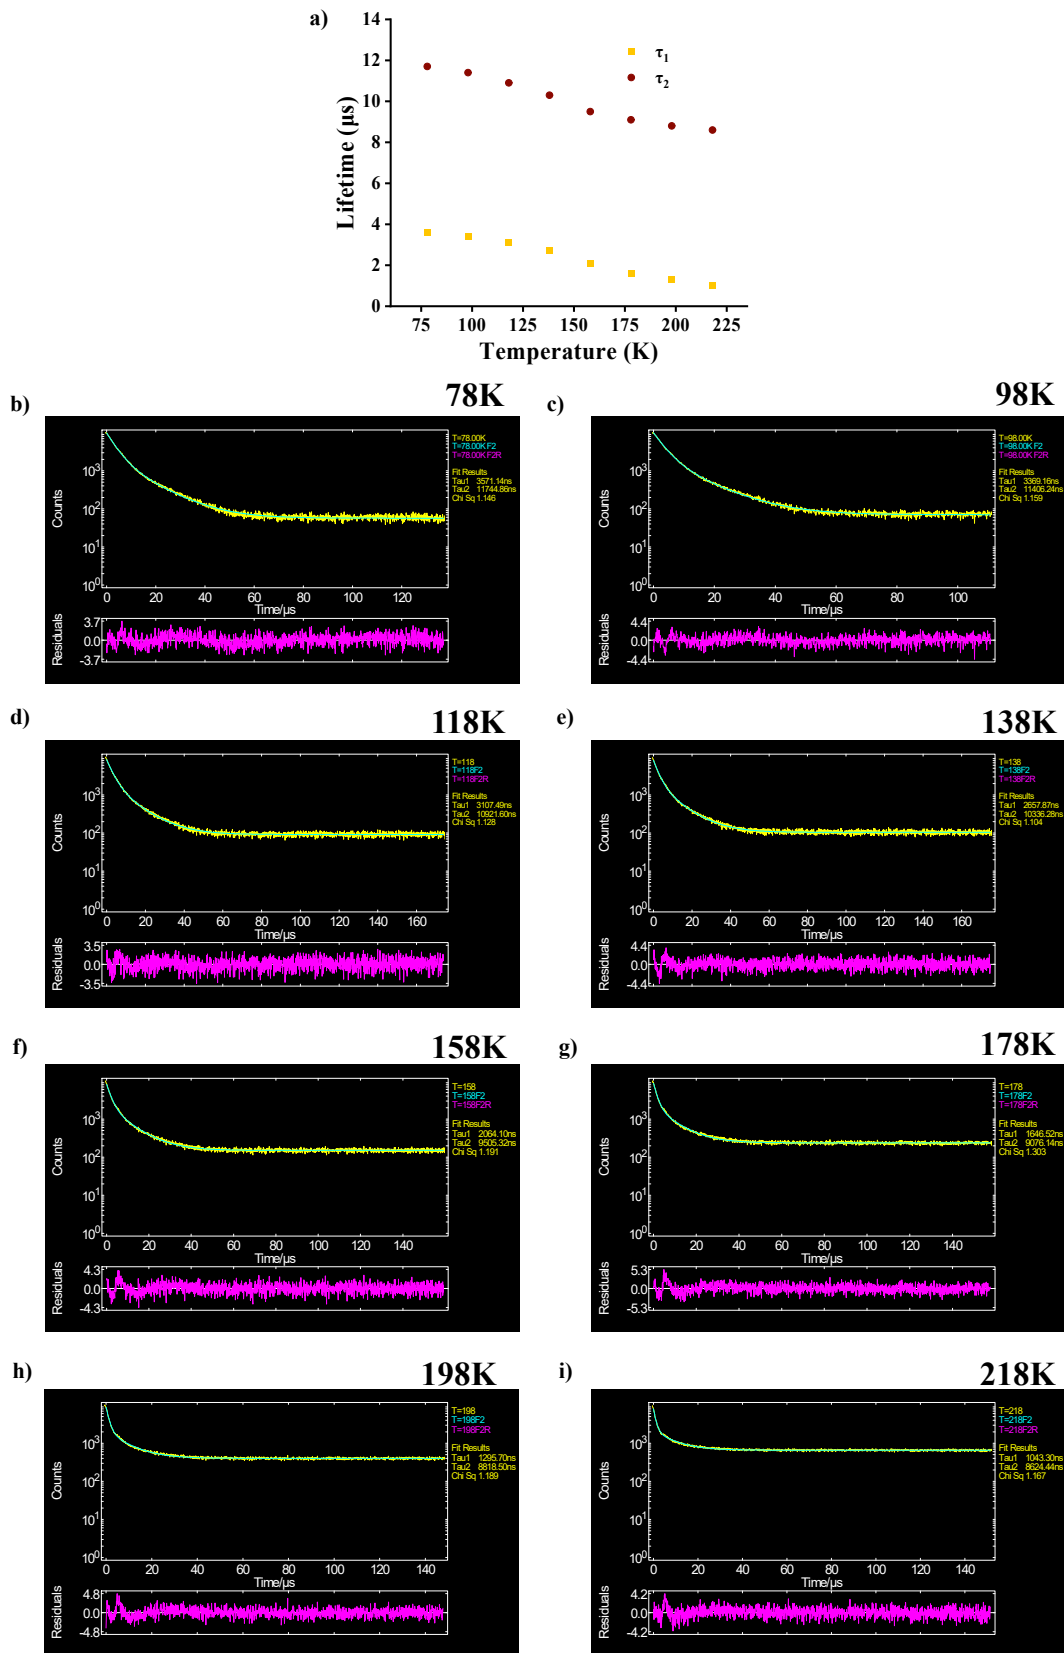

**Figure S38** Plot of lifetime variations of the complex **Br-1-Nd** in PMMA upon excitation at 460 nm from 78-218 K. a-h) Fitting results of **Br-1-Nd** at various temperatures in PMMA ( $\lambda_{\text{ex}} = 461 \text{ nm}$ ,  $\lambda_{\text{em}} = 1063 \text{ nm}$ ).

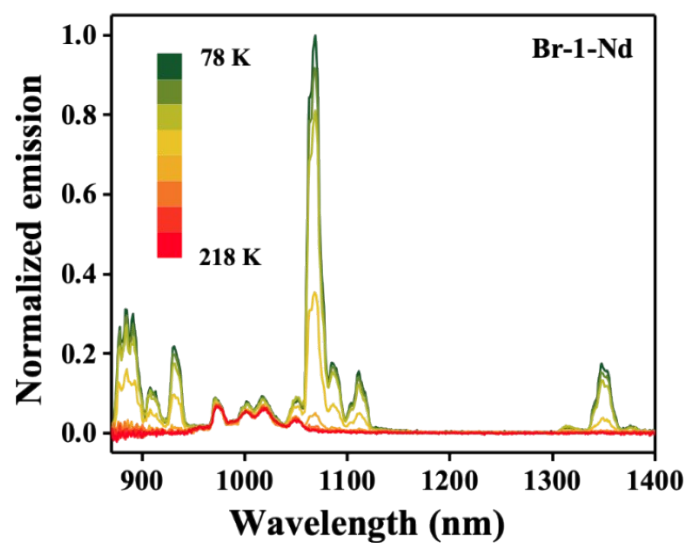

**Figure S39** Temperature change spectra of **Br-1-Nd** in 2-methyltetrahydrofuran solution upon excitation at 460 nm from 78-218 K, the absorbance of excitation wavelength was fixed at 0.1.

## Supporting reference

- [1] Guo, L.-J.; Zhang, J.-L. Highly NIR-II luminescent erbium porphyrinoids. *J. Porphyrins Phthalocyanines* **2023**, *27*, 1348-1356.
